# Supplementary material for: KCa3.1 Channels Confer Radioresistance to Breast Cancer Cells
Source: MDPI journal article supplement (doi:10.3390/cancers11091285), 2019-09-01
Supplement: s1 [file s1]

# Supplementary Materials: K<sub>Ca</sub>3.1 Channels Confer Radioresistance to Breast Cancer Cells

Corinna J. Mohr, Dominic Gross, Efe C. Sezgin, Friederike A. Steudel, Peter Ruth, Stephan M. Huber and Robert Lukowski

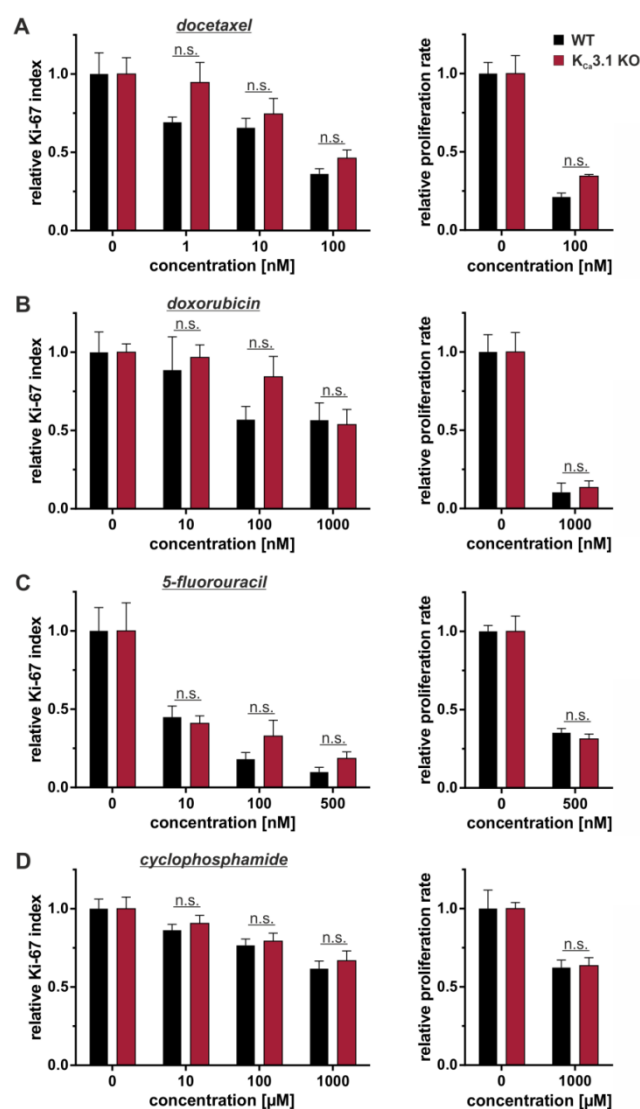

**Figure S1.** Anti-cancer chemotherapeutics inhibit proliferation of MMTV-PyMT breast cancer cells independent from K<sub>Ca</sub>3.1. Effect of increasing concentrations of (A) docetaxel, (B) doxorubicin, (C) 5-fluorouracil or (D) cyclophosphamide on proliferation of MMTV-PyMT K<sub>Ca</sub>3.1 WT (black bars) and KO (red bars) cells. Proliferation was assessed with immunofluorescence by Ki-67 index (A–D, left plots) and histologically by grid-based cell count (A–D, right plots). Data are shown as the means ± SE (*n* = 4–5) after normalization to the respective control conditions. *n.s.* indicates non-significant difference between treatment groups as determined by two-way ANOVA with Sidak's post-hoc test.

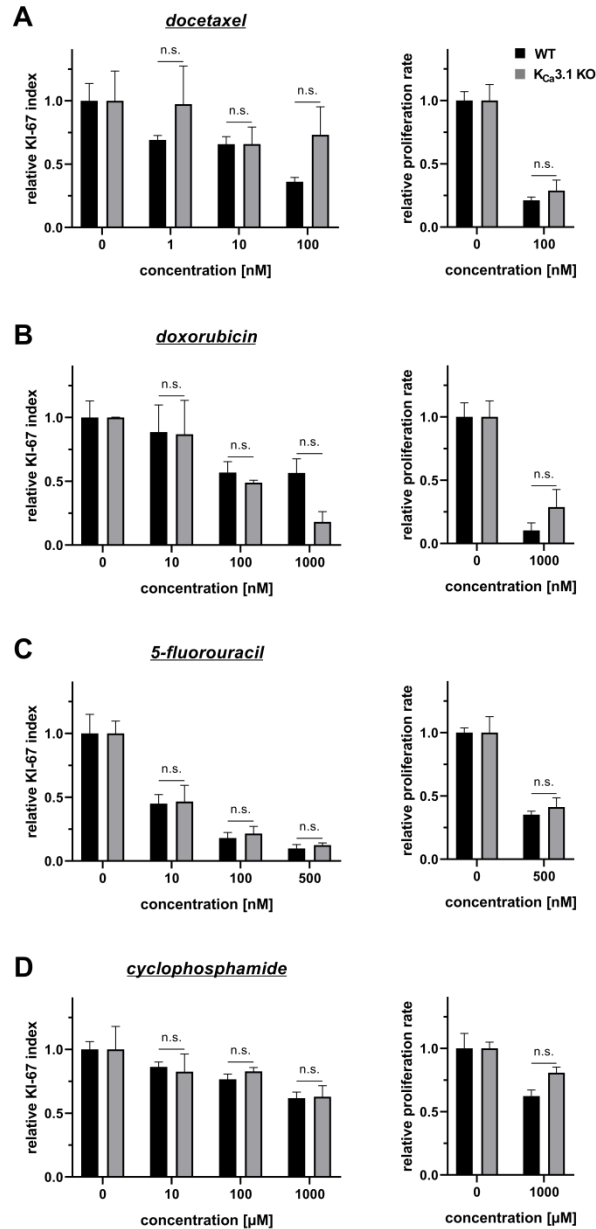

**Figure S2.** Pharmacological blockade of K<sub>Ca</sub>3.1 channels does not improve the anti-cancer actions of chemotherapeutics in MMTV-PyMT breast cancer cells. Effect of increasing concentrations of (A) docetaxel, (B) doxorubicin, (C) 5-fluorouracil or (D) cyclophosphamide on proliferation of MMTV-PyMT K<sub>Ca</sub>3.1 WT cells, which were either left untreated (black bars) or challenged with 10 μM TRAM-34 (grey bars). Proliferation was assessed with immunofluorescence by Ki-67 index (A-D, left plots) and histologically by grid-based cell counts (A-D, right plots). Data are shown as the means ± SE ( $n = 3-5$ ) after normalization to the respective control conditions in the absence of TRAM-34 and chemotherapeutics. *n.s.* indicates non-significant difference between treatment groups as determined by two-way ANOVA with Sidak's post-hoc test.

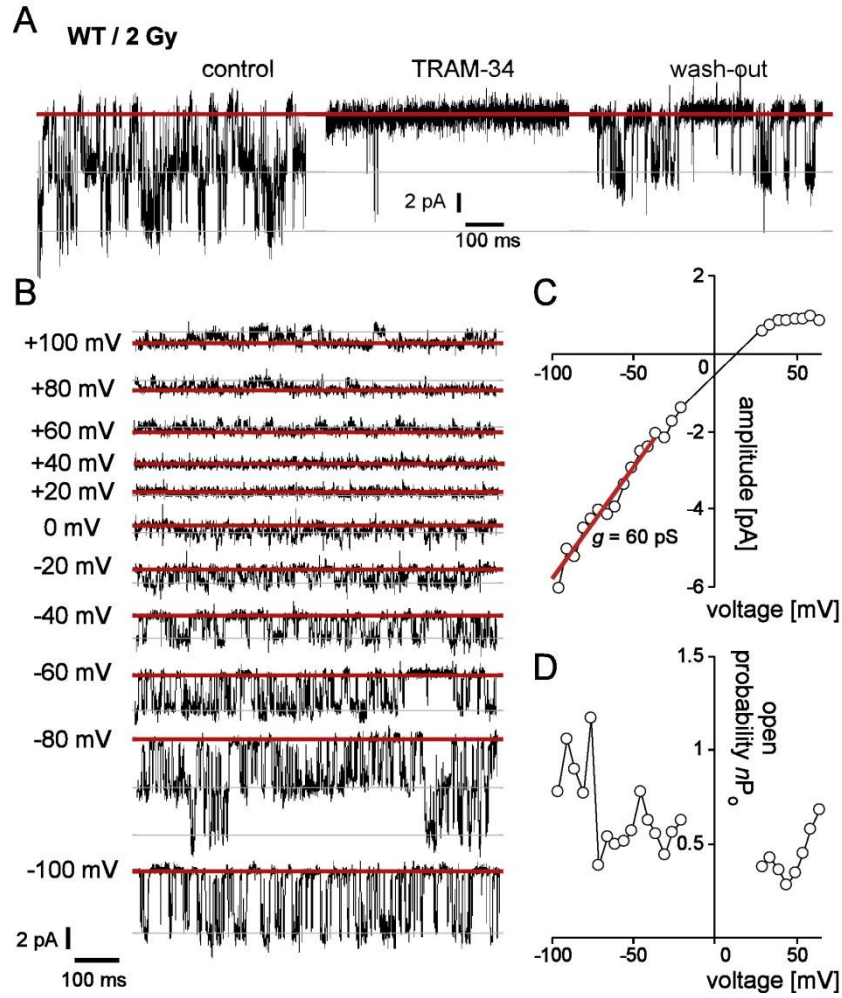

**Figure S3.** Breast cancer MMTV-PyMT WT cells functionally express TRAM-34-sensitive, inwardly rectifying, intermediate conductance and voltage-independent ion channels. **(A)** Single channel current transitions recorded in on-cell mode at  $-100 \text{ mV}$  holding potential with KCl pipette- and NaCl bath solution from a 2 Gy irradiated MMTV-PyMT WT cell (320 min post irradiation) before, during, and after (wash-out) of TRAM-34 ( $2 \mu\text{M}$ ). The red and grey lines indicate zero current and distinct unitary current levels. **(B)** Current tracings recorded at different holding potential as indicated. **(C)** Dependence of the unitary current transition (amplitude) and **(D)** open probability ( $nP_o$ ) on holding potential.

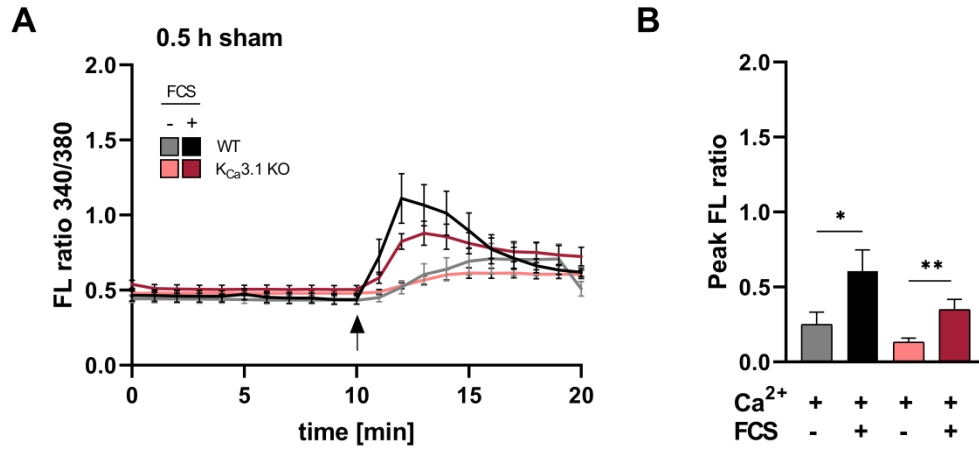

**Figure S4.**  $[Ca^{2+}]_i$  signals in MMTV-PyMT breast tumor cells depend on  $K_{Ca3.1}$  channels. **(A)** Acute  $Ca^{2+}$  signals of MMTV-PyMT mammary tumor cells evoked by  $Ca^{2+}$  (1.8 mM) only (grey, light red lines) or  $Ca^{2+}$  (1.8 mM) plus 5% FCS (black, red lines) after 30 min of sham treatment. FURA-2-AM-loaded cells were monitored in  $Ca^{2+}$ -free buffer for 10 min prior to the respective treatments as indicated. Arrow indicated buffer replacement. **(B)** The mean peak fluorescence (FL) ratio of the 340/380 nm wavelength was determined relatively to the respective baseline FL ratio for non-irradiated MMTV-PyMT  $K_{Ca3.1}$  KO ( $n = 11-21$  cells per condition derived from three different breast tumors) and WT ( $n = 9-15$  cells per condition derived from three different breast tumors) groups. Statistical analysis was performed by two-way ANOVA with \* and \*\* indicating  $p \leq 0.05$  and  $p \leq 0.01$ , respectively, significant difference between genotypes.

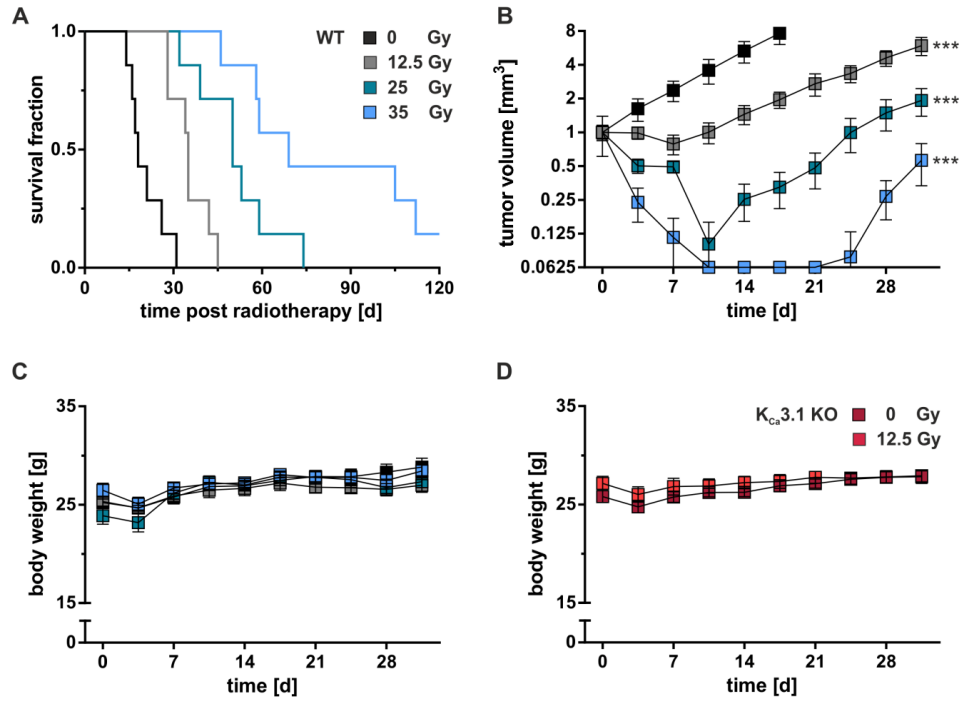

**Figure S5.** Radiation dose-response of MMTV-PyMT breast tumors and body weight. **(A)** Radiosensitivity of MMTV-PyMT Kca3.1 WT tumors in WT mice was tested by delivery of 12.5, 25 or 35 Gy in five fractions. Each individual dose regime led to a prolonged survival time as compared to unirradiated tumors (0 Gy). **(B)** Increase in tumor volumes was significantly delayed in the irradiated tumors as compared to the control situation (0 Gy). \*\*\* indicates  $p \leq 0.001$  determined from two-way repeated measures ANOVAs and Tukey's test. Due to its significant but intermediary effect, 12.5 Gy radiation dose was chosen for further experiments. MMTV-PyMT **(C)** WT or **(D)** Kca3.1 KO tumor-bearing WT mice did not differ in their body weight during the first four weeks after start of radiotherapy. Shown are means  $\pm$  SE of  $n = 7$  experiments in **(A)**.
